# Supplementary material for: Low-temperature threshold for egg survival of a post-diapause and non-diapause European aedine strain, Aedes albopictus (Diptera: Culicidae)
Source: PubMed Central journal article supplement (PMC3403971; doi:10.1186/1756-3305-5-100), 2012-05-23

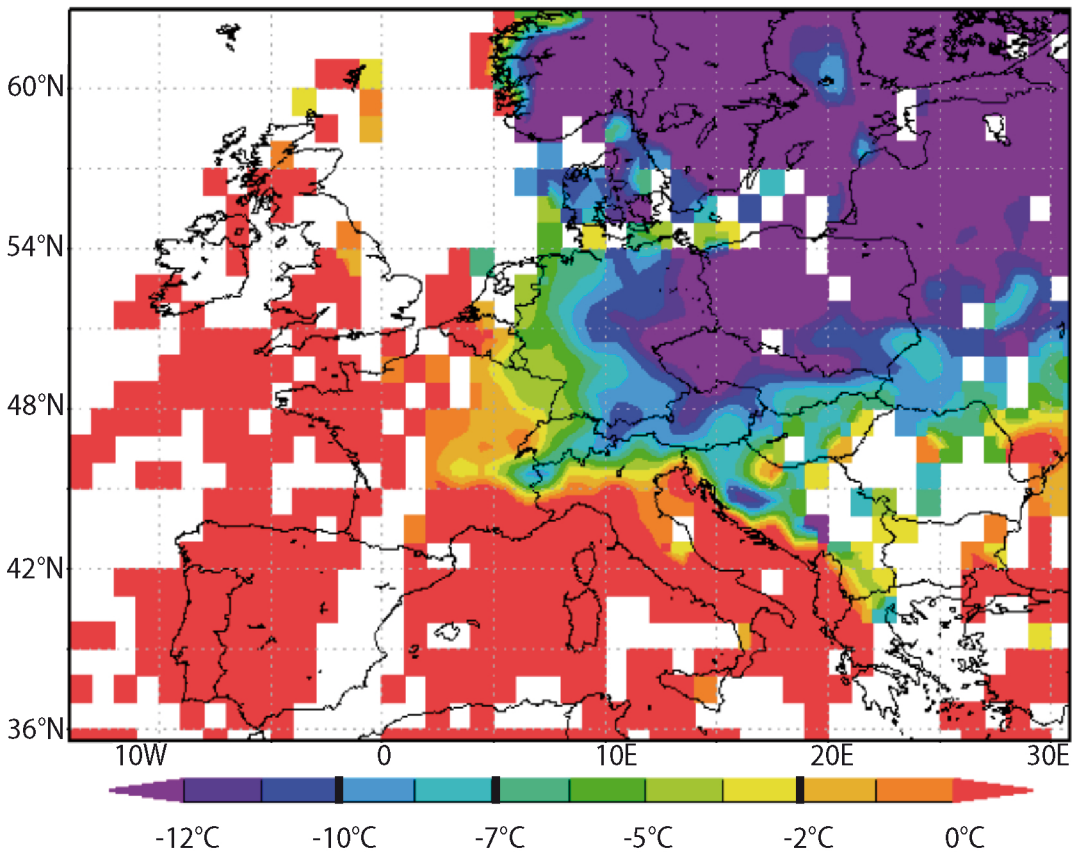

Supplement: 1756-3305-5-100-S1.pdf [file 1756-3305-5-100-S1.pdf]
